# Supplementary material
Source: publisher figshare collection journal article supplement (https://acs.figshare.com/ndownloader/files/13607114)
Supplement: Supplementary file 1 [file 13607114]

## **Supporting Information**

### **Mild Synthesis of Copper Nanoparticles with Enhanced Oxidative Stability and Their Application in Antibacterial Films**

Liangzhen Tang,<sup>#,a</sup> Li Zhu,<sup>#,b</sup> Fu Tang,<sup>\*,a</sup> Chuang Yao,<sup>c</sup> Jie Wang,<sup>a</sup> and Lidong Li<sup>\*,a</sup>

<sup>a</sup>State Key Laboratory for Advanced Metals and Materials, School of Materials Science and Engineering, University of Science and Technology Beijing, Beijing 100083, China

<sup>b</sup>Department of Otolaryngology, Peking University Third Hospital, Beijing 100191, China

<sup>c</sup>Key Laboratory of Extraordinary Bond Engineering and Advanced Materials Technology (EBEAM) of Chongqing, Yangtze Normal University, Chongqing 408100, China.

#### **Corresponding Author**

\*E-mail: lidong@mater.ustb.edu.cn (L.L.); tangfu@ustb.edu.cn (F. T.)

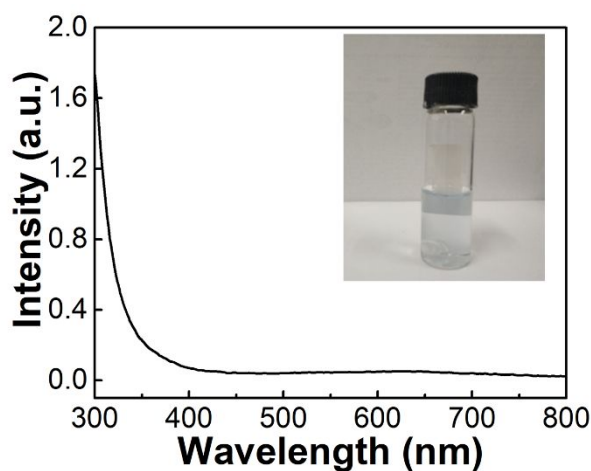

**Figure S1.** UV-vis spectrum of the reaction solution where DAS was replaced by an unmodified starch. The inset is the photograph of the corresponding reaction solution.

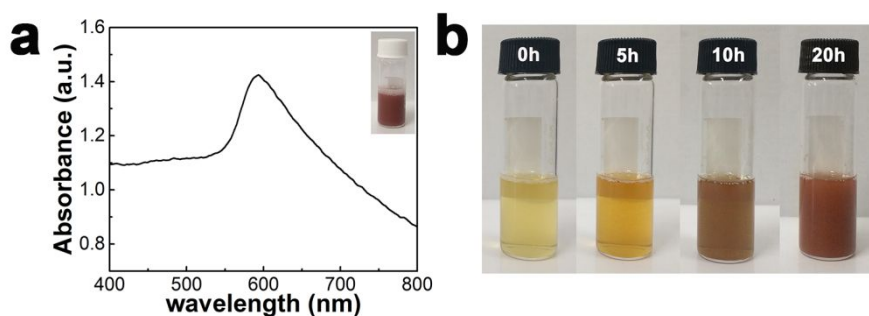

**Figure S2.** (a) UV-vis absorption spectrum of obtained Cu nanoparticles at room temperature after 20 h. (b) Photographs of reaction solutions at different times.

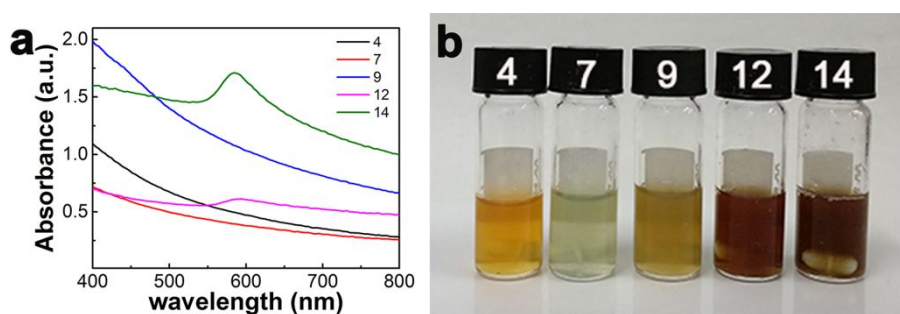

**Figure S3.** (a) UV-vis absorption spectra of reaction solution under different pH environments after incubation at 50 °C for 3 h (b) and corresponding photographs of reaction solutions.
